# Supplementary material for: Comparative transcriptomics reveal a novel tardigrade-specific DNA-binding protein induced in response to ionizing radiation
Source: eLife journal article supplement (doi:10.7554/elife.92621), 2024-01-11

|                     |    |      |   |  |         |   |   |
|---------------------|----|------|---|--|---------|---|---|
| Time after IR (h)   | 24 | 6 24 |   |  | 24 6 24 |   |   |
| Cycloheximide 250μM | -  | -    | - |  | +       | + | + |
| IR (1000 Gy)        | -  | +    | + |  | -       | + | + |

Tubulin

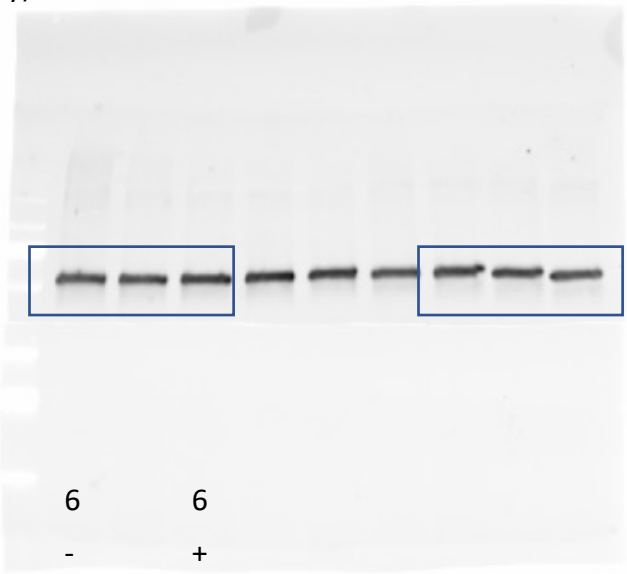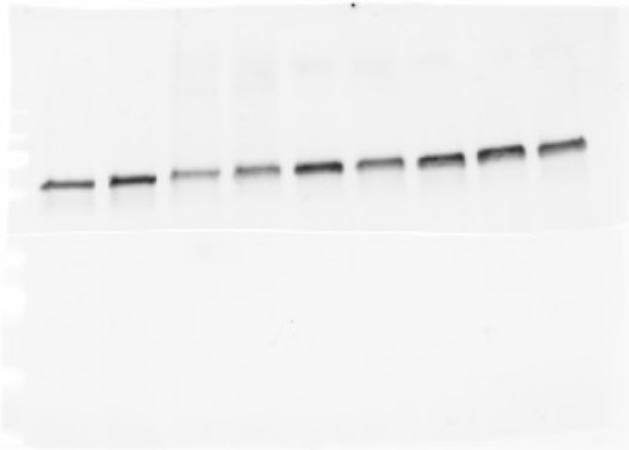

Tubulin

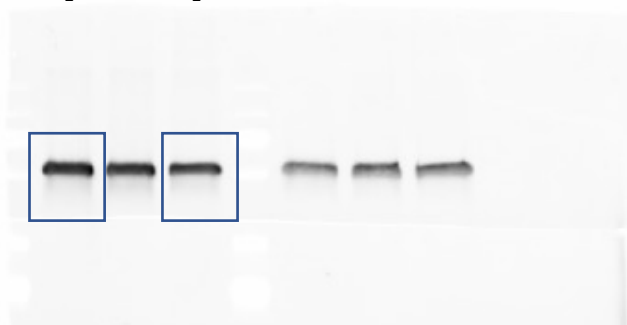

|                     |    |      |   |  |         |   |   |
|---------------------|----|------|---|--|---------|---|---|
| Time after IR (h)   | 24 | 6 24 |   |  | 24 6 24 |   |   |
| Cycloheximide 250μM | -  | -    | - |  | +       | + | + |
| IR (1000 Gy)        | -  | +    | + |  | -       | + | + |

Ku70-XRCC6

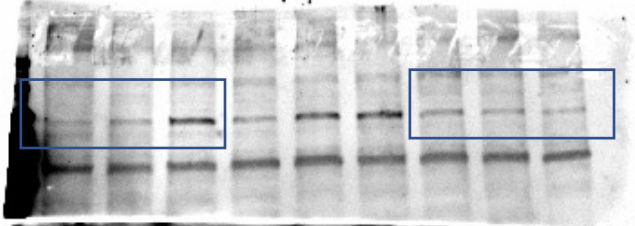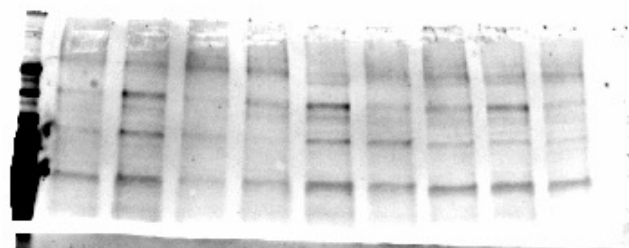

TDR1 sat

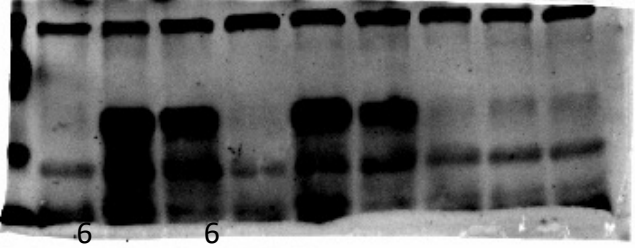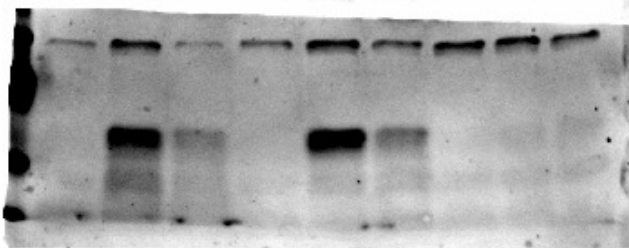

Ku70-XRCC6

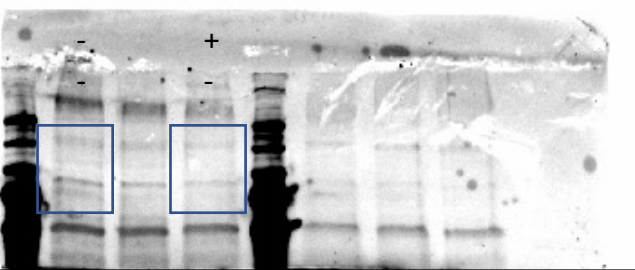

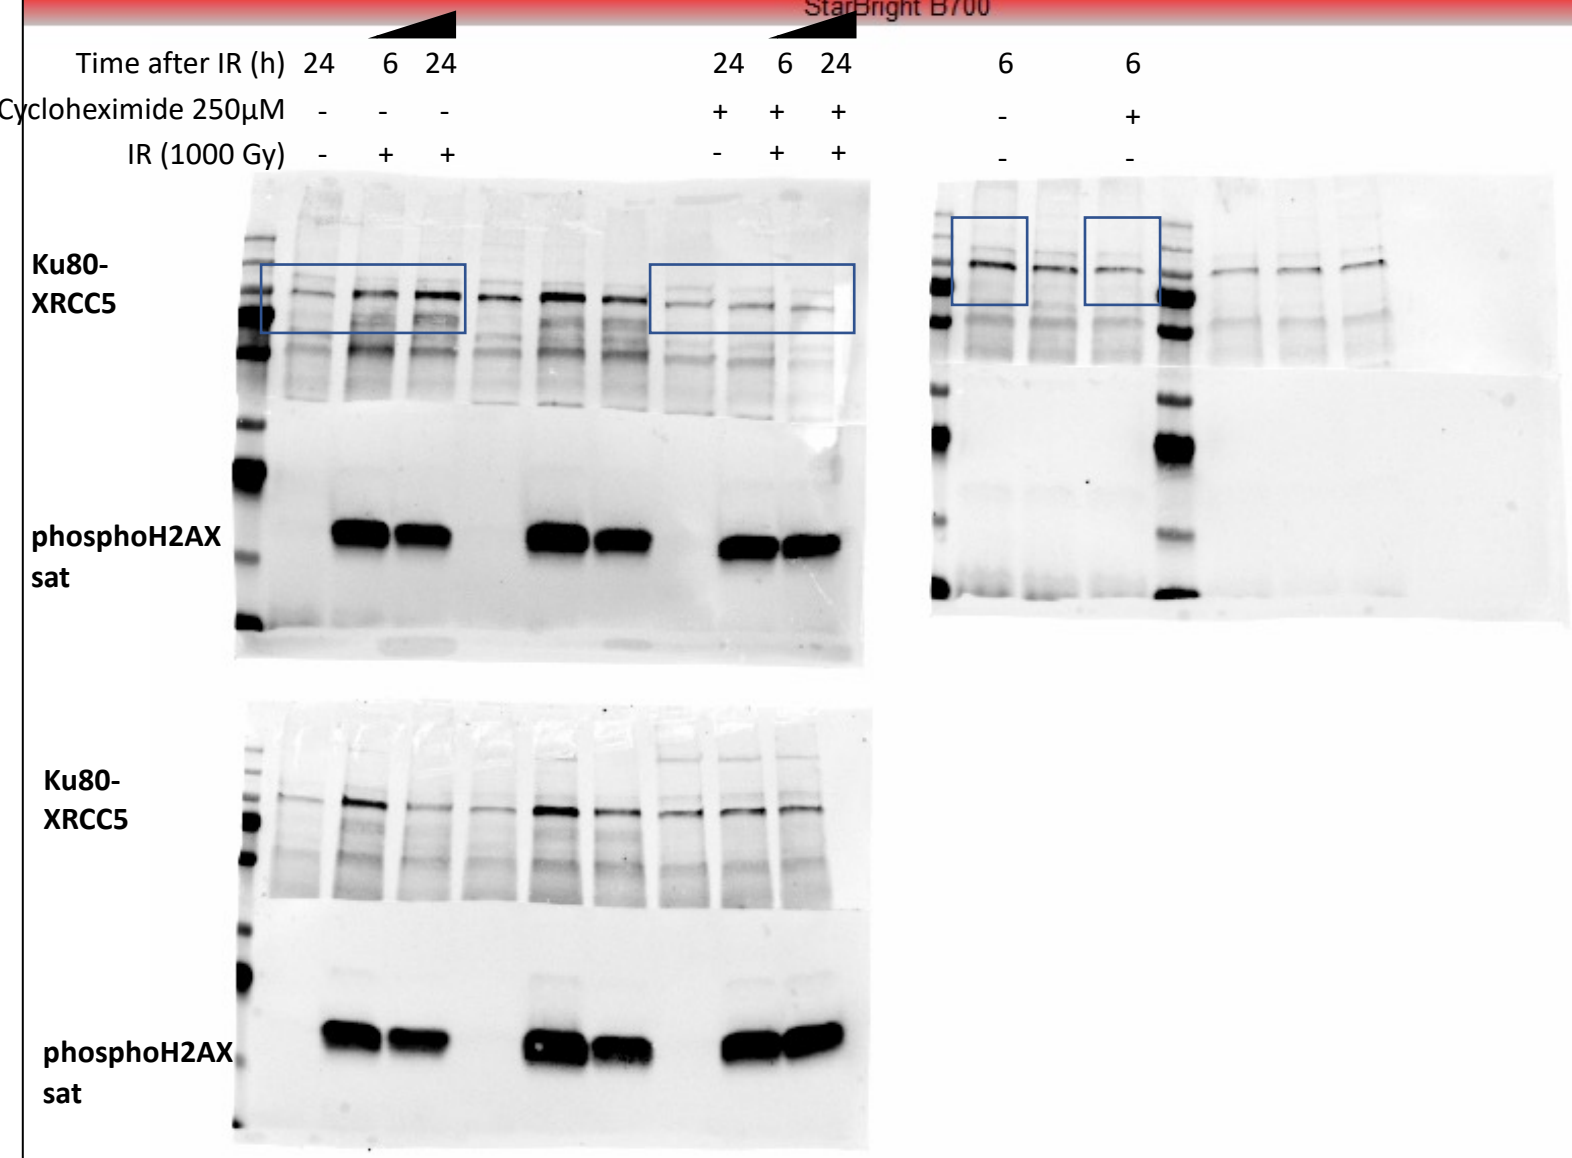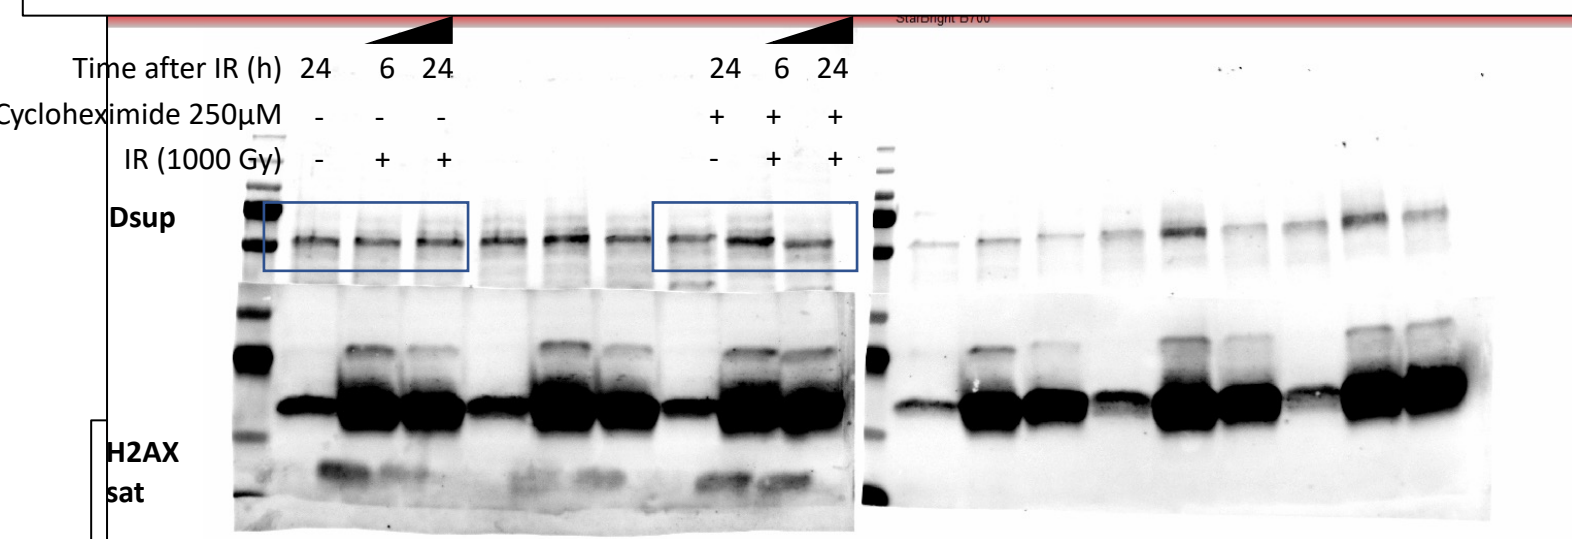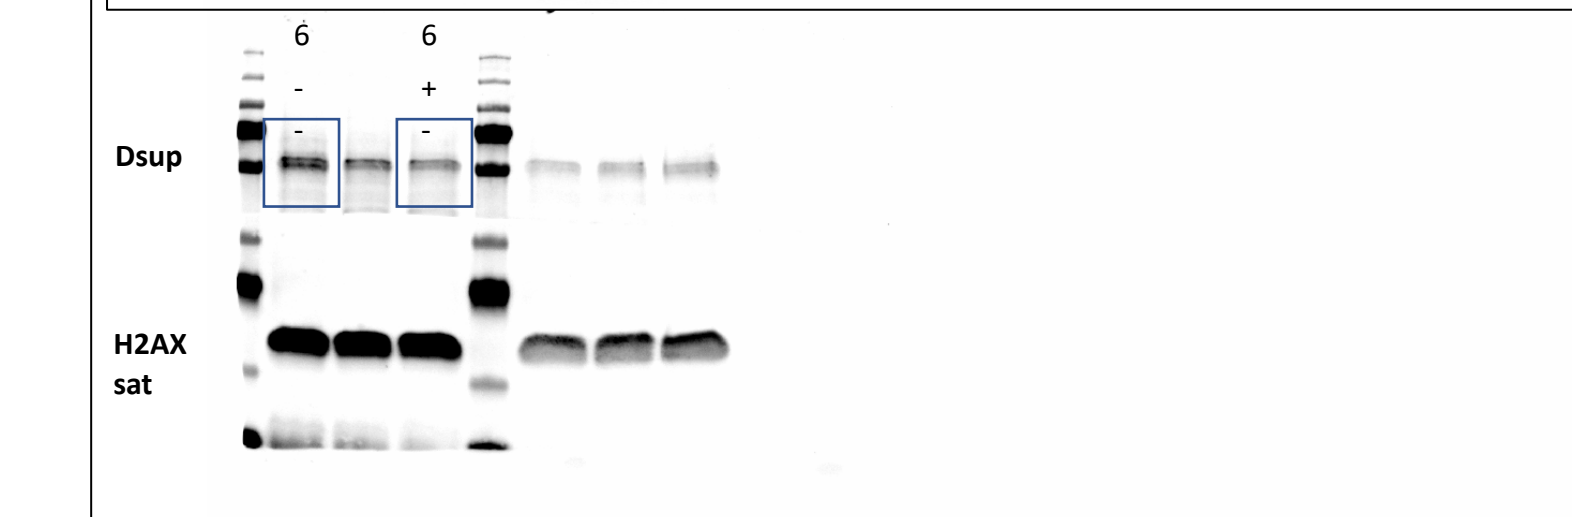

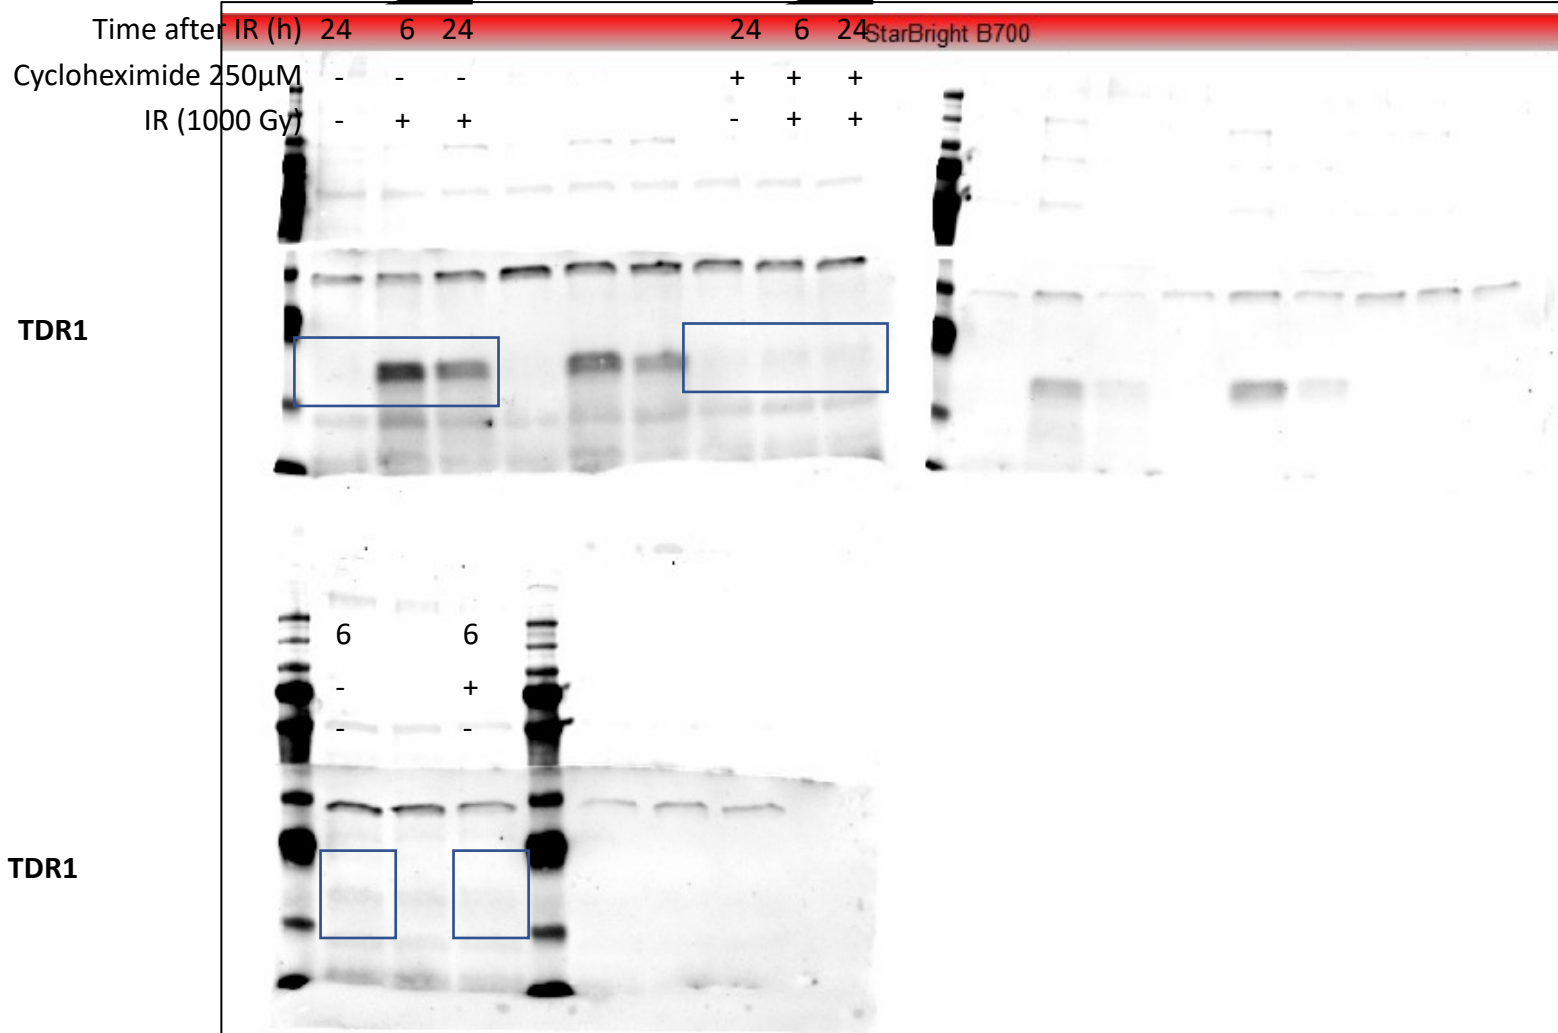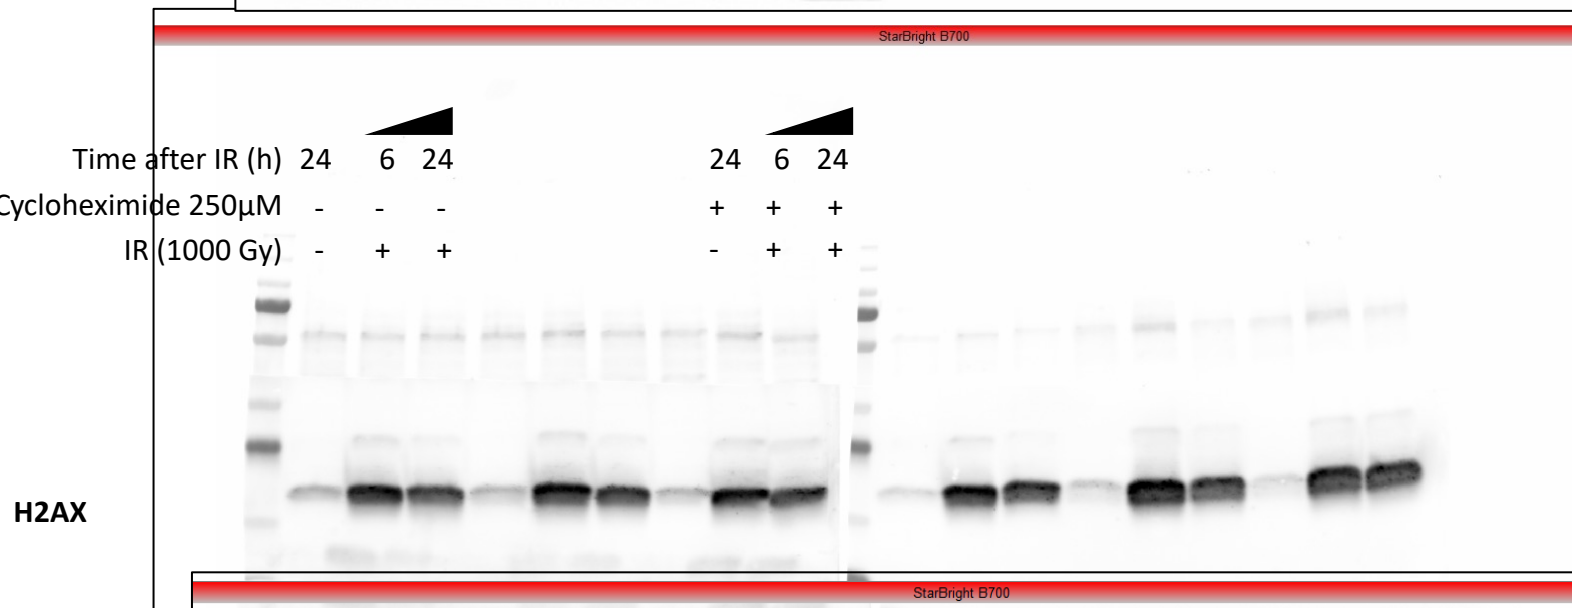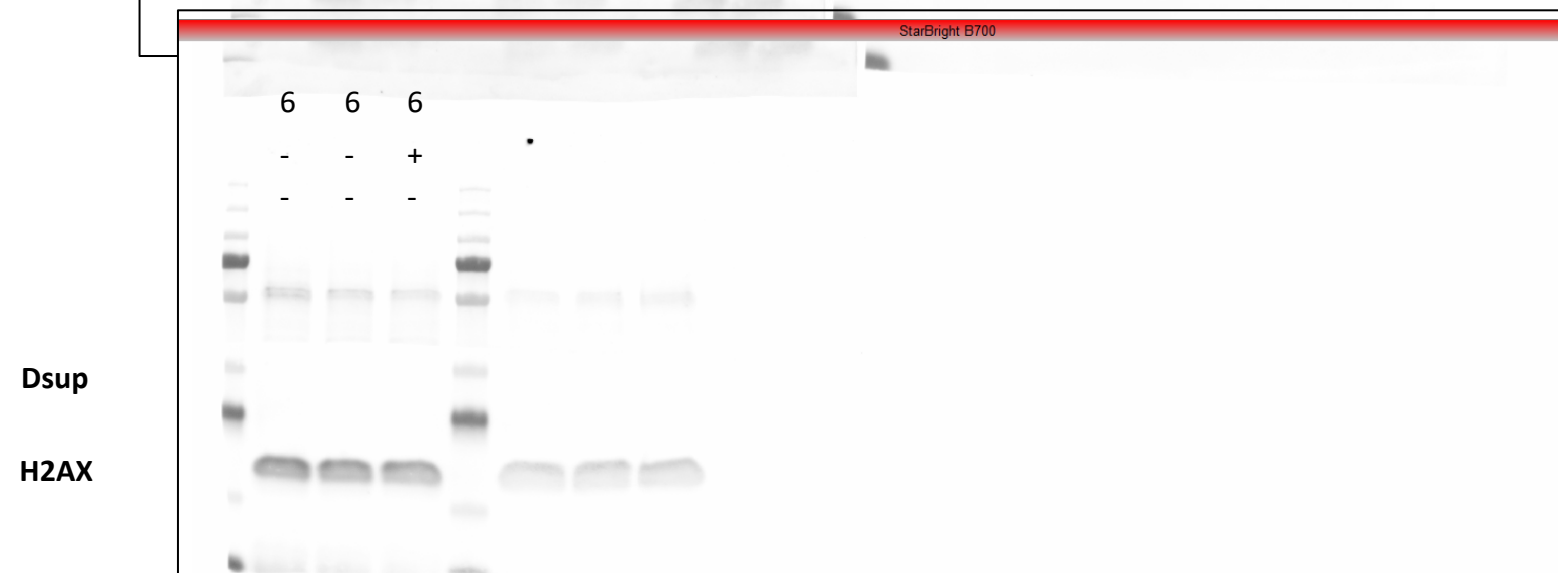

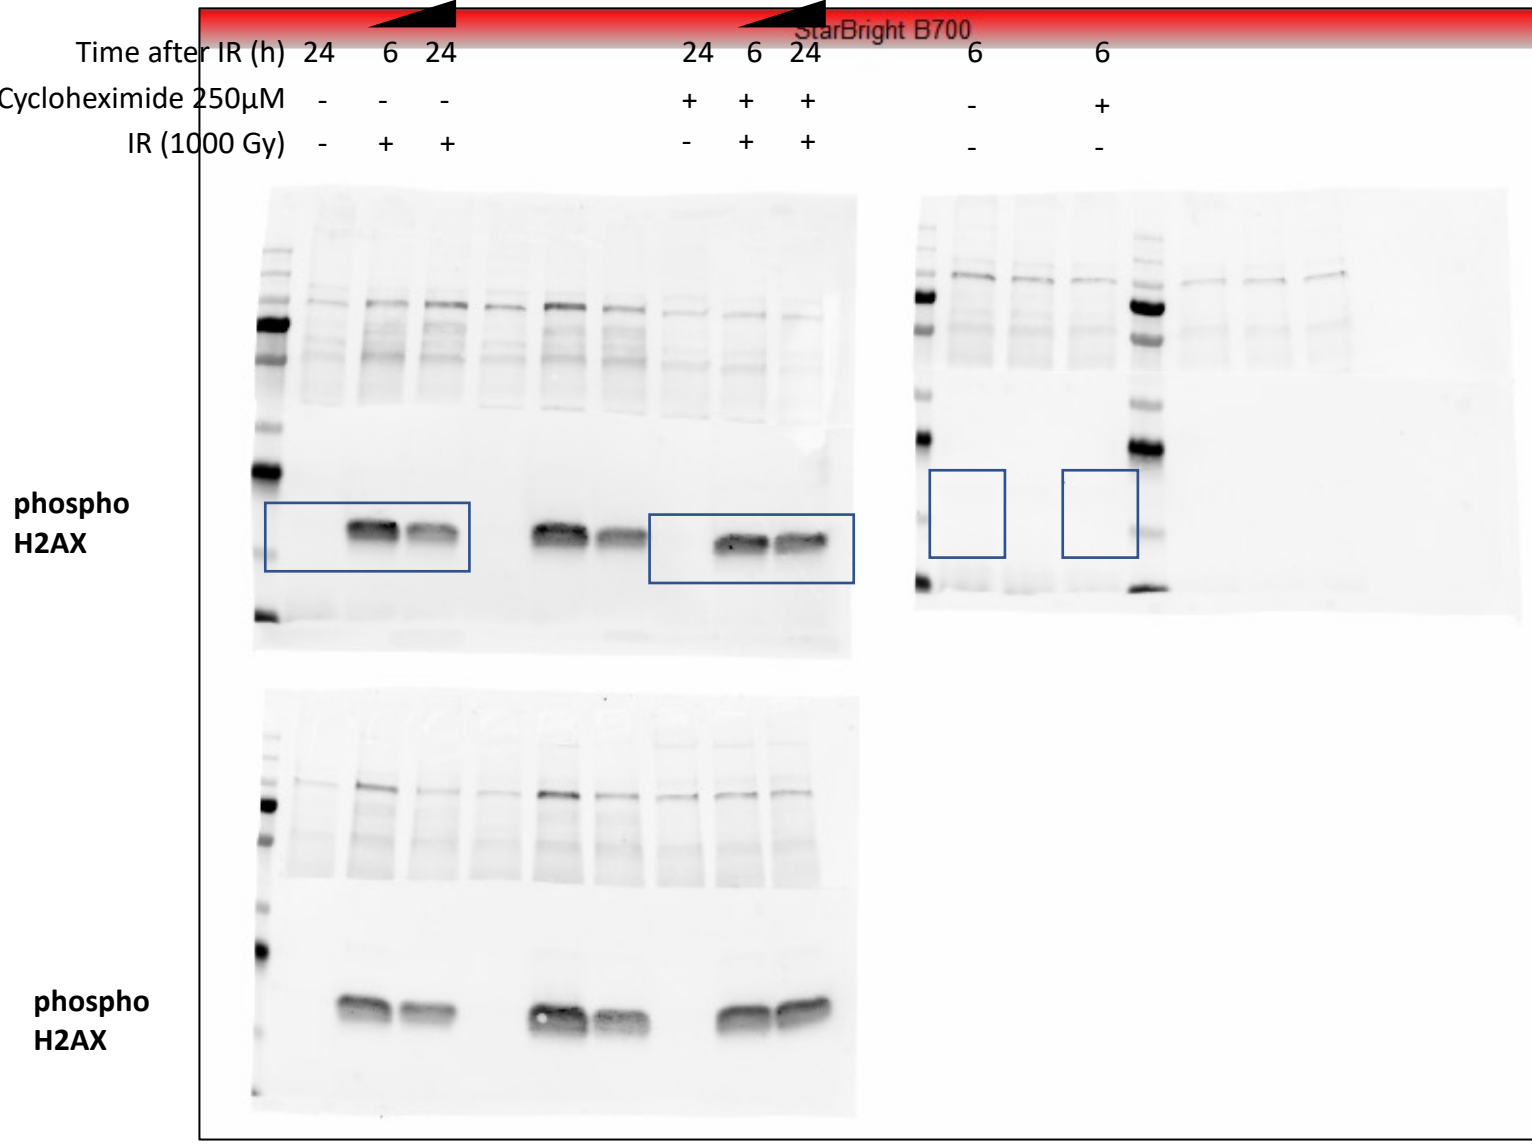

Supplement: fig3-figsupp2-data2 [file elife-92621-fig3-figsupp2-data2-v1.pdf]
