# Supplementary material for: Comparative transcriptomics reveal a novel tardigrade-specific DNA-binding protein induced in response to ionizing radiation
Source: PubMed Central journal article supplement (PMC11233135; doi:10.7554/elife.92621), 2024-07-09

Time after IR(h)      -      **100Gy**      -      -      **1000Gy**      -      -  
 0.5      0.5      4      8.5      24      73      73      4.2      0.5      4      8.5      24      73      8.5      24

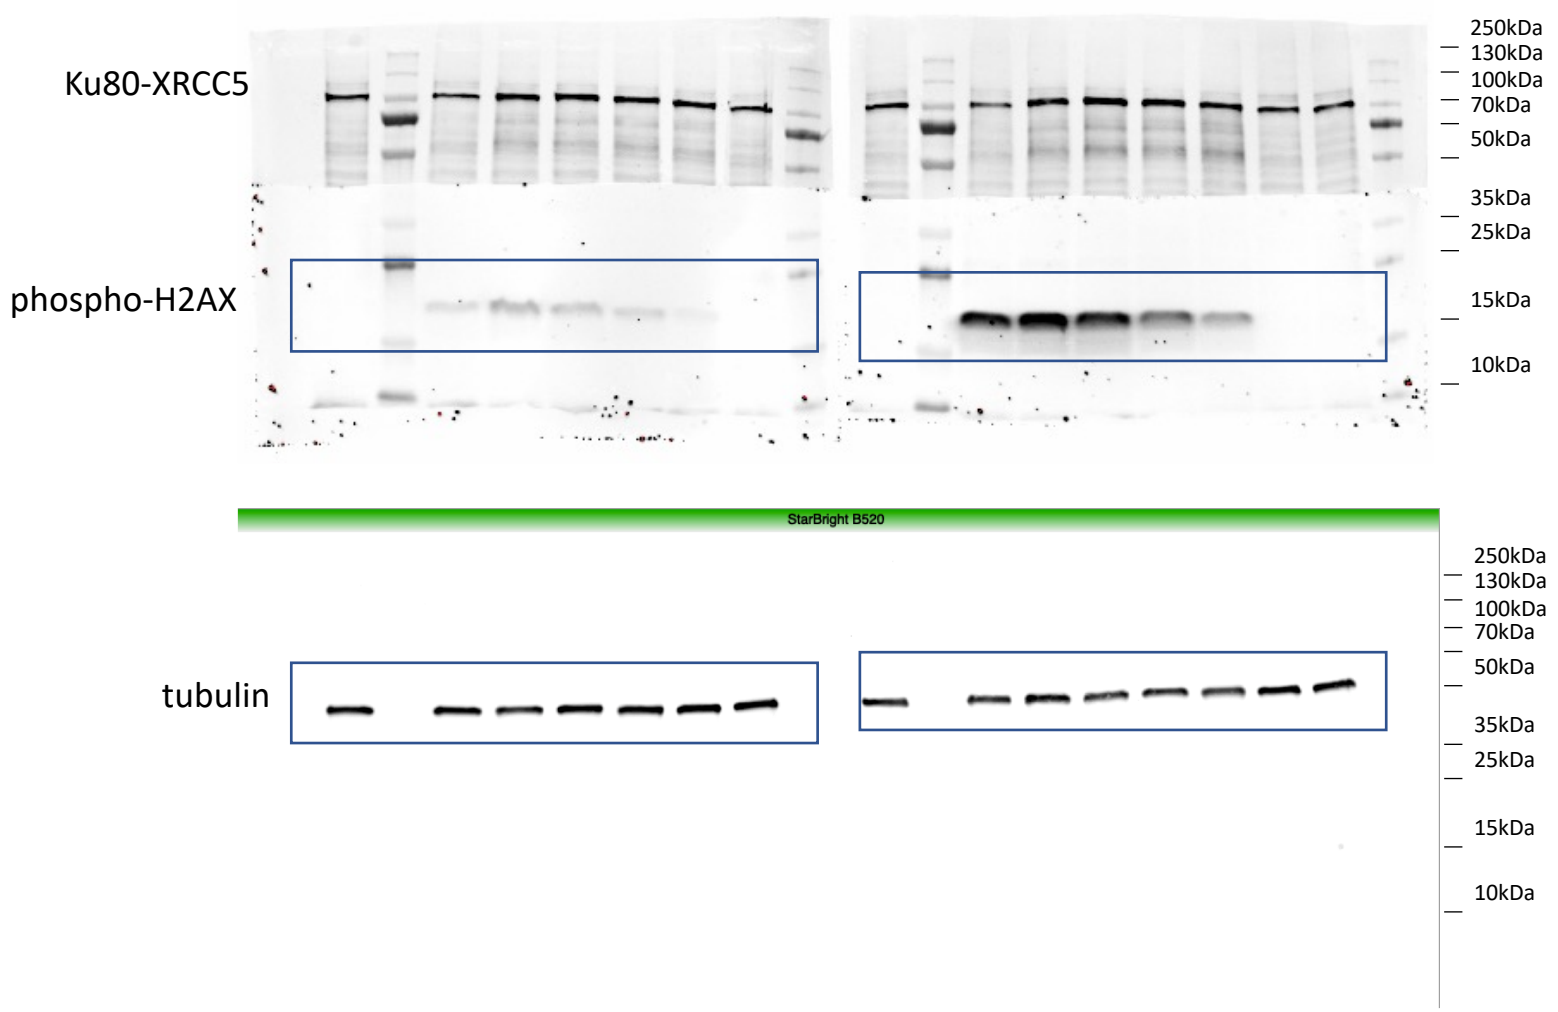

Supplement: elife-92621-fig1-data2.pdf [file elife-92621-fig1-data2.pdf]
