# Supplementary material for: Comparative transcriptomics reveal a novel tardigrade-specific DNA-binding protein induced in response to ionizing radiation
Source: PubMed Central journal article supplement (PMC11233135; doi:10.7554/elife.92621), 2024-07-09

**a**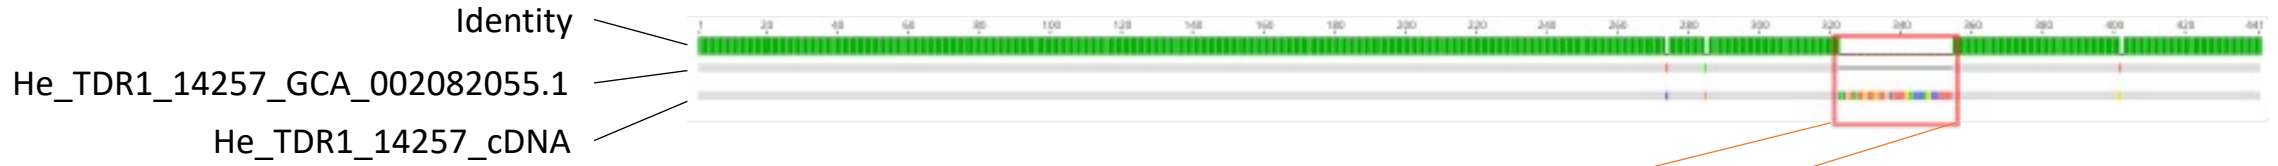**b**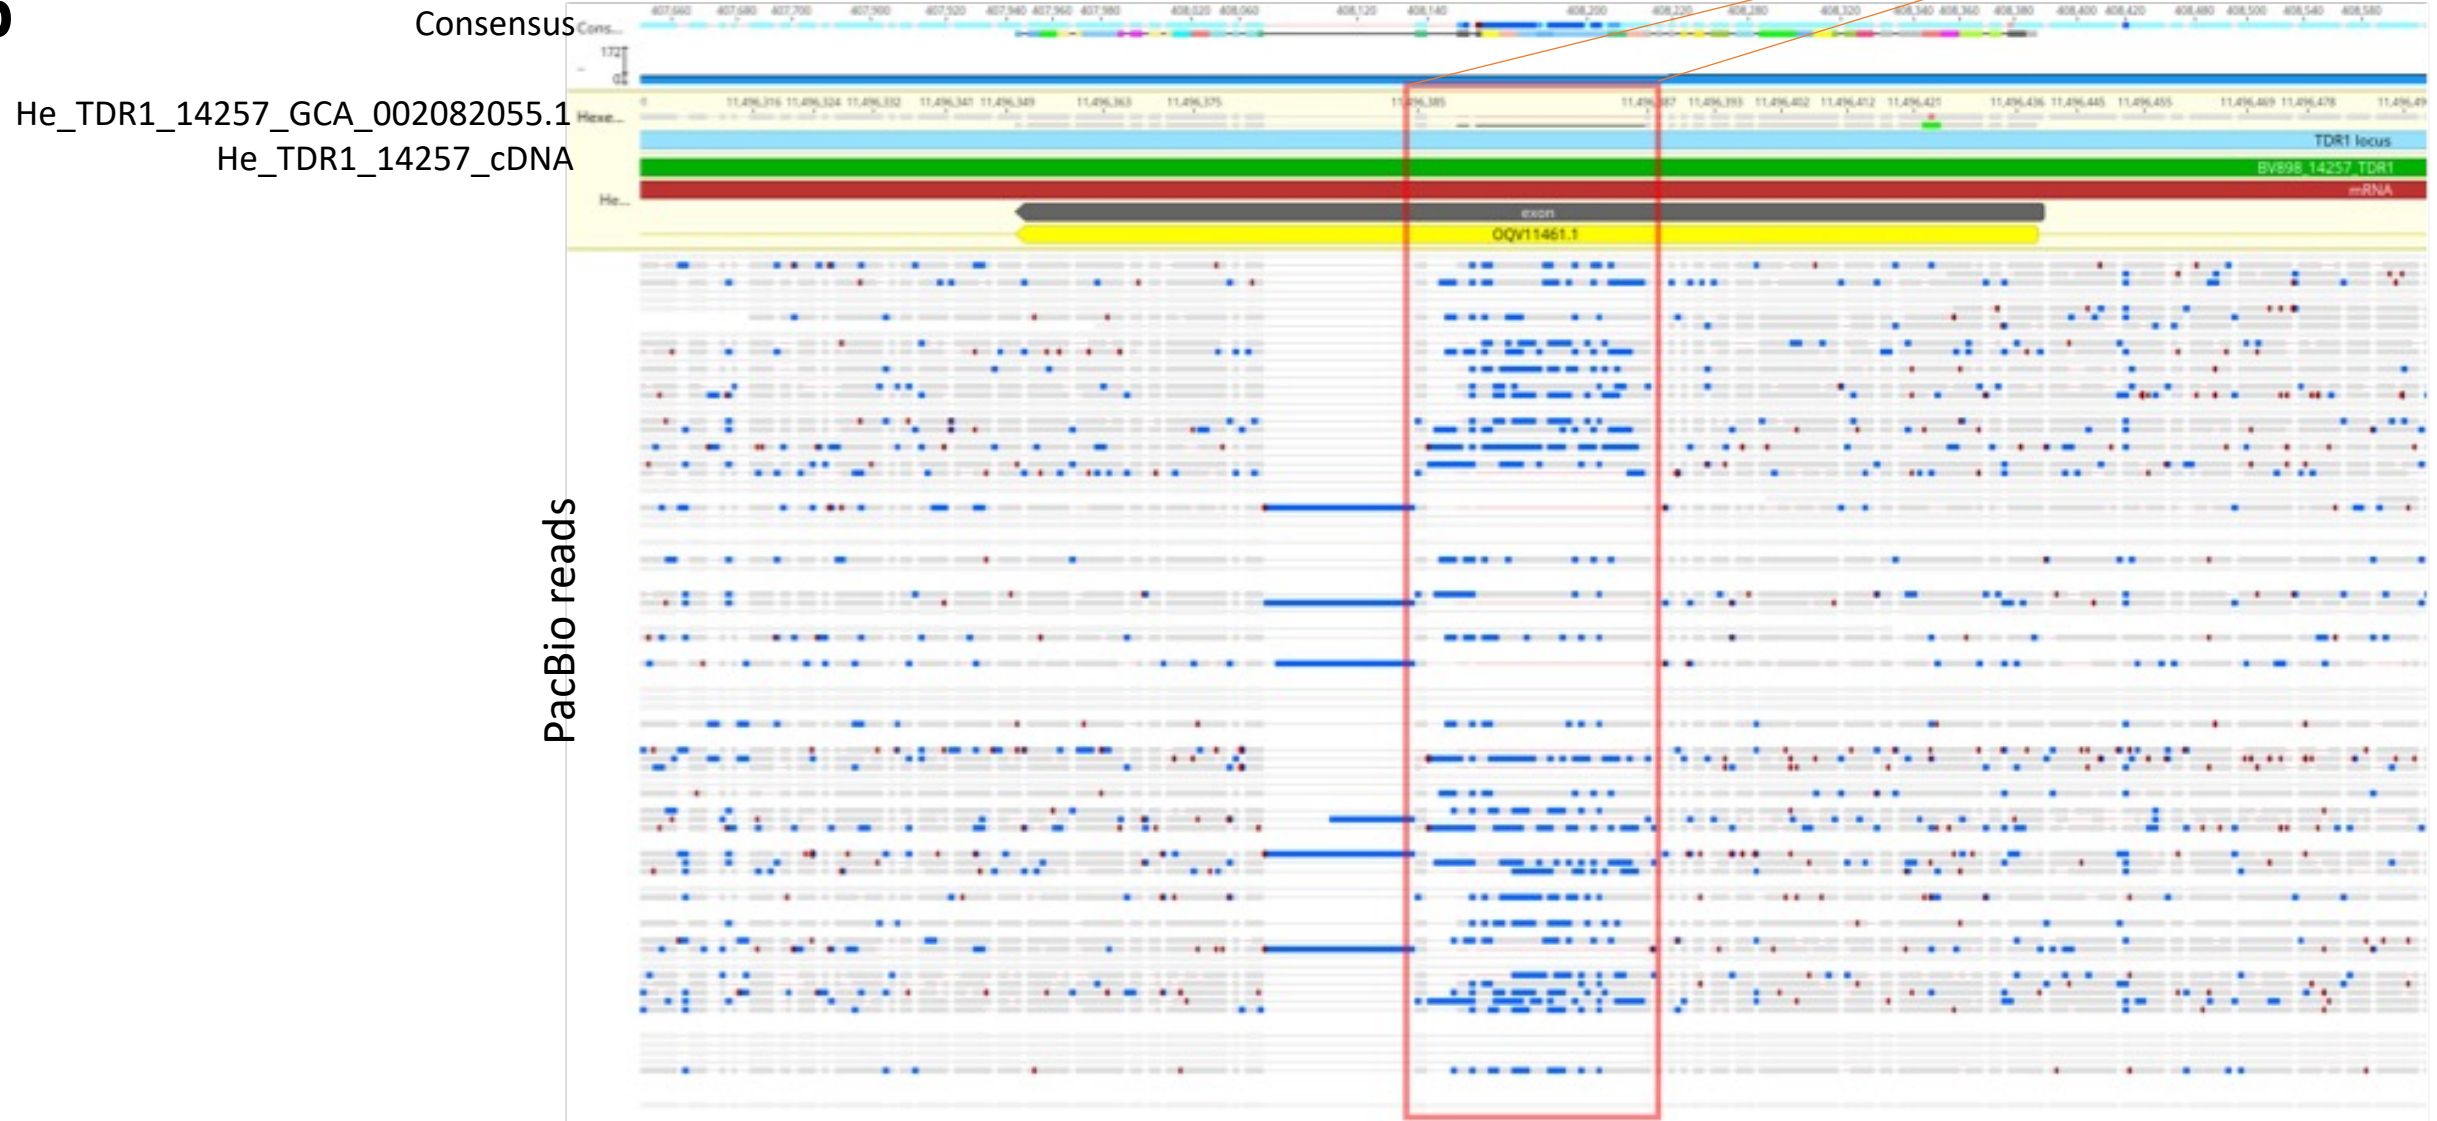

Supplement: elife-92621-supp1.pdf [file elife-92621-supp1.pdf]
