# Supplementary material for: Comparative transcriptomics reveal a novel tardigrade-specific DNA-binding protein induced in response to ionizing radiation
Source: PubMed Central journal article supplement (PMC11233135; doi:10.7554/elife.92621), 2024-07-09
Supplement: elife-92621-supp5.pdf [file elife-92621-supp5.pdf]

**a**

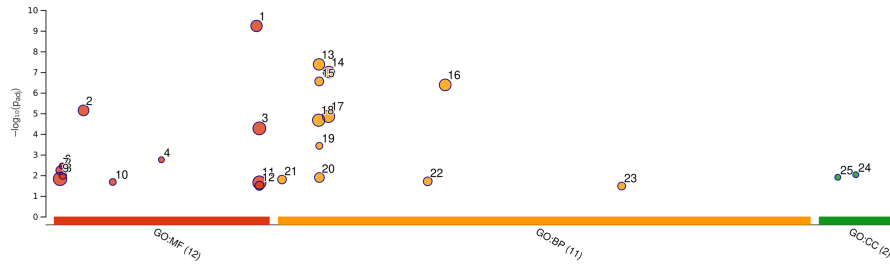

| ID | Source | Term ID    | Term Name                                        | Padj (query_1)          |
|----|--------|------------|--------------------------------------------------|-------------------------|
| 1  | GO:MF  | GO:0140097 | catalytic activity, acting on DNA                | 5.827×10 <sup>-10</sup> |
| 2  | GO:MF  | GO:0008094 | ATP-dependent activity, acting on DNA            | 7.179×10 <sup>-9</sup>  |
| 3  | GO:MF  | GO:0140640 | catalytic activity, acting on a nucleic acid     | 5.338×10 <sup>-9</sup>  |
| 4  | GO:MF  | GO:0042162 | telomeric DNA binding                            | 1.768×10 <sup>-8</sup>  |
| 5  | GO:MF  | GO:0003909 | DNA ligase activity                              | 3.542×10 <sup>-8</sup>  |
| 6  | GO:MF  | GO:0003910 | DNA ligase (ATP) activity                        | 3.542×10 <sup>-8</sup>  |
| 7  | GO:MF  | GO:0003684 | damaged DNA binding                              | 5.753×10 <sup>-8</sup>  |
| 8  | GO:MF  | GO:0003950 | NAD+ ADP-ribosyltransferase activity             | 1.023×10 <sup>-7</sup>  |
| 9  | GO:MF  | GO:0003677 | DNA binding                                      | 1.487×10 <sup>-7</sup>  |
| 10 | GO:MF  | GO:0016886 | ligase activity, forming phosphoric ester bonds  | 2.113×10 <sup>-7</sup>  |
| 11 | GO:MF  | GO:0140657 | ATP-dependent activity                           | 2.237×10 <sup>-7</sup>  |
| 12 | GO:MF  | GO:0140658 | ATP-dependent chromatin remodeler activity       | 3.221×10 <sup>-7</sup>  |
| 13 | GO:BP  | GO:0006281 | DNA repair                                       | 4.234×10 <sup>-8</sup>  |
| 14 | GO:BP  | GO:0006974 | DNA damage response                              | 9.943×10 <sup>-8</sup>  |
| 15 | GO:BP  | GO:0006302 | double-strand break repair                       | 2.828×10 <sup>-7</sup>  |
| 16 | GO:BP  | GO:0033554 | cellular response to stress                      | 4.177×10 <sup>-7</sup>  |
| 17 | GO:BP  | GO:0006950 | response to stress                               | 1.399×10 <sup>-6</sup>  |
| 18 | GO:BP  | GO:0006259 | DNA metabolic process                            | 2.138×10 <sup>-6</sup>  |
| 19 | GO:BP  | GO:0006303 | double-strand break repair via nonhomologous ... | 3.738×10 <sup>-6</sup>  |
| 20 | GO:BP  | GO:0006310 | DNA recombination                                | 1.280×10 <sup>-5</sup>  |
| 21 | GO:BP  | GO:0000723 | telomere maintenance                             | 1.604×10 <sup>-5</sup>  |
| 22 | GO:BP  | GO:0032200 | telomere organization                            | 1.967×10 <sup>-5</sup>  |
| 23 | GO:BP  | GO:0071897 | DNA biosynthetic process                         | 3.324×10 <sup>-5</sup>  |
| 24 | GO:CC  | GO:0043564 | Ku70:Ku80 complex                                | 9.374×10 <sup>-3</sup>  |
| 25 | GO:CC  | GO:0030870 | Mre11 complex                                    | 1.242×10 <sup>-3</sup>  |

version e109\_eg56\_p17\_1d3191d  
 date 6/27/2023, 9:55:36 AM  
 organism hegca002082055v1

g:Profiler

**b**

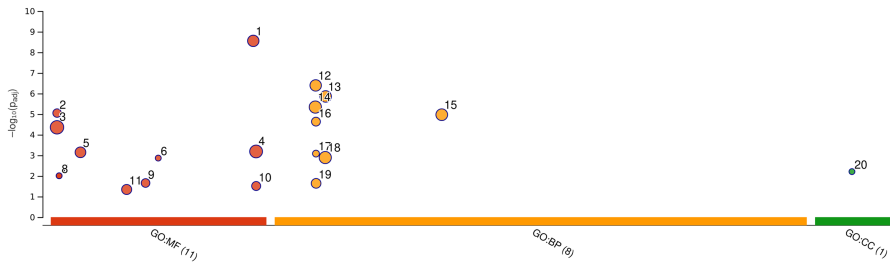

| ID | Source | Term ID    | Term Name                                        | Padj (query_1)         |
|----|--------|------------|--------------------------------------------------|------------------------|
| 1  | GO:MF  | GO:0140097 | catalytic activity, acting on DNA                | 2.786×10 <sup>-9</sup> |
| 2  | GO:MF  | GO:0003684 | damaged DNA binding                              | 8.895×10 <sup>-9</sup> |
| 3  | GO:MF  | GO:0003677 | DNA binding                                      | 4.371×10 <sup>-8</sup> |
| 4  | GO:MF  | GO:0140640 | catalytic activity, acting on a nucleic acid     | 6.492×10 <sup>-8</sup> |
| 5  | GO:MF  | GO:0008094 | ATP-dependent activity, acting on DNA            | 7.142×10 <sup>-8</sup> |
| 6  | GO:MF  | GO:0042162 | telomeric DNA binding                            | 1.360×10 <sup>-7</sup> |
| 7  | GO:MF  | GO:0003910 | DNA ligase (ATP) activity                        | 9.840×10 <sup>-8</sup> |
| 8  | GO:MF  | GO:0003909 | DNA ligase activity                              | 9.840×10 <sup>-8</sup> |
| 9  | GO:MF  | GO:0034061 | DNA polymerase activity                          | 2.203×10 <sup>-7</sup> |
| 10 | GO:MF  | GO:0140658 | ATP-dependent chromatin remodeler activity       | 3.083×10 <sup>-7</sup> |
| 11 | GO:MF  | GO:0030527 | structural constituent of chromatin              | 4.549×10 <sup>-7</sup> |
| 12 | GO:BP  | GO:0006281 | DNA repair                                       | 4.044×10 <sup>-7</sup> |
| 13 | GO:BP  | GO:0006974 | DNA damage response                              | 1.389×10 <sup>-6</sup> |
| 14 | GO:BP  | GO:0006259 | DNA metabolic process                            | 4.551×10 <sup>-6</sup> |
| 15 | GO:BP  | GO:0033554 | cellular response to stress                      | 1.069×10 <sup>-5</sup> |
| 16 | GO:BP  | GO:0006302 | double-strand break repair                       | 2.318×10 <sup>-5</sup> |
| 17 | GO:BP  | GO:0006303 | double-strand break repair via nonhomologous ... | 8.244×10 <sup>-5</sup> |
| 18 | GO:BP  | GO:0006950 | response to stress                               | 1.281×10 <sup>-3</sup> |
| 19 | GO:BP  | GO:0006310 | DNA recombination                                | 2.291×10 <sup>-2</sup> |
| 20 | GO:CC  | GO:0043564 | Ku70:Ku80 complex                                | 6.174×10 <sup>-3</sup> |

version e109\_eg56\_p17\_1d3191d  
 date 6/27/2023, 10:03:30 AM  
 organism hegca002082055v1

g:Profiler

C

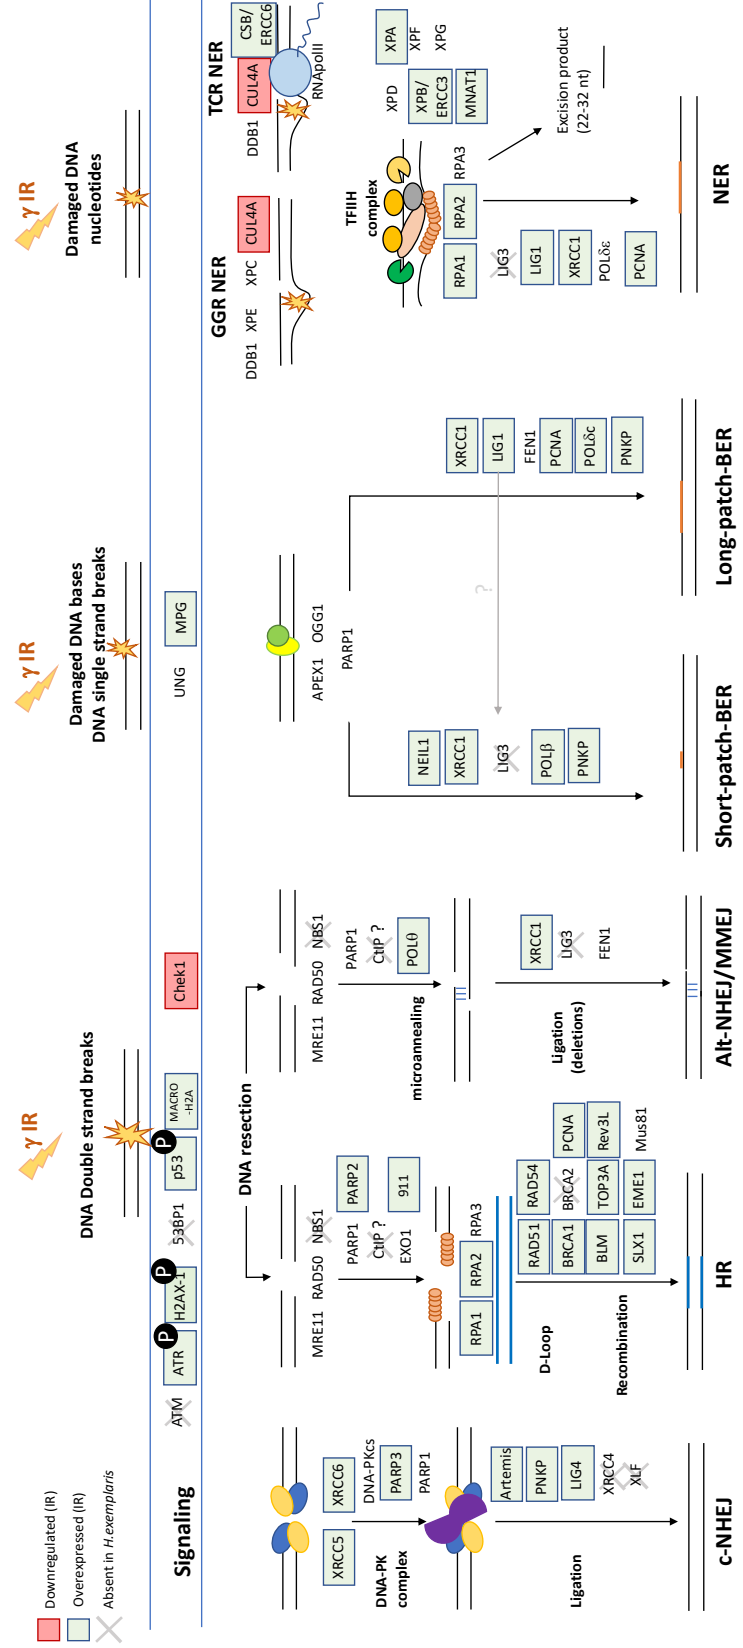

d

| term_name<br>term_id<br>Species | Base excision repair<br>KEGG:03410 |               |              | Nucleotide excision repair<br>KEGG:03420 |               |              | Mismatch repair<br>KEGG:03430 |               |              | Homologous recombination<br>KEGG:03440 |               |              | Non-homologous end-joining<br>KEGG:03450 |               |              | Fanconi anemia pathway<br>KEGG:03460 |               |              |
|---------------------------------|------------------------------------|---------------|--------------|------------------------------------------|---------------|--------------|-------------------------------|---------------|--------------|----------------------------------------|---------------|--------------|------------------------------------------|---------------|--------------|--------------------------------------|---------------|--------------|
|                                 | H.exemplaris                       | A.antarcticus | P.fairbanksi | H.exemplaris                             | A.antarcticus | P.fairbanksi | H.exemplaris                  | A.antarcticus | P.fairbanksi | H.exemplaris                           | A.antarcticus | P.fairbanksi | H.exemplaris                             | A.antarcticus | P.fairbanksi | H.exemplaris                         | A.antarcticus | P.fairbanksi |
| APEX1                           | APEX1                              |               |              |                                          |               |              |                               |               |              |                                        |               |              |                                          |               |              |                                      |               |              |
| APEX2                           | APEX2                              |               |              |                                          |               |              |                               |               |              |                                        |               |              |                                          |               |              |                                      |               |              |
| ATR                             |                                    |               |              |                                          |               |              |                               |               |              |                                        |               |              |                                          |               |              | ATR                                  |               | ATR          |
| BLM                             |                                    |               |              |                                          |               |              |                               |               |              | BLM                                    |               | BLM          |                                          |               |              | BLM                                  |               | BLM          |
| BRIP1                           |                                    |               |              |                                          |               |              |                               |               |              | BRIP1                                  |               | BRIP1        |                                          |               |              | BRIP1                                |               | BRIP1        |
| CCNH                            |                                    |               |              | CCNH                                     |               |              |                               |               |              |                                        |               |              |                                          |               |              |                                      |               |              |
| CDK7                            |                                    |               |              | CDK7                                     | CDK7          | CDK7         |                               |               |              |                                        |               |              |                                          |               |              |                                      |               |              |
| CUL4A                           |                                    |               |              | CUL4A                                    | CUL4A         | CUL4A        |                               |               |              |                                        |               |              |                                          |               |              |                                      |               |              |
| DCLRE1C                         |                                    |               |              |                                          |               |              |                               |               |              |                                        |               |              | DCLRE1C                                  |               |              |                                      |               |              |
| DDB1                            |                                    |               |              | DDB1                                     |               | DDB1         |                               |               |              |                                        |               |              |                                          |               |              |                                      |               |              |
| ERCC1                           |                                    |               |              | ERCC1                                    |               |              |                               |               |              |                                        |               |              |                                          |               |              |                                      |               | ERCC1        |
| ERCC2                           |                                    |               |              |                                          | ERCC2         |              |                               |               |              |                                        |               |              |                                          |               |              |                                      |               |              |
| ERCC3                           |                                    |               |              | ERCC3                                    | ERCC3         | ERCC3        |                               |               |              |                                        |               |              |                                          |               |              |                                      |               |              |
| ERCC4                           |                                    |               |              | ERCC4                                    |               | ERCC4        |                               |               |              |                                        |               |              |                                          |               |              |                                      |               | ERCC4        |
| ERCC5                           |                                    |               |              |                                          | ERCC5         |              |                               |               |              |                                        |               |              |                                          |               |              |                                      |               |              |
| ERCC6                           |                                    |               |              | ERCC6                                    | ERCC6         | ERCC6        |                               |               |              |                                        |               |              |                                          |               |              |                                      |               |              |
| FAN1                            |                                    |               |              |                                          |               |              |                               |               |              |                                        |               |              |                                          |               |              |                                      |               | FAN1         |
| FANCM                           |                                    |               |              |                                          |               |              |                               |               |              |                                        |               |              |                                          |               |              |                                      |               | FANCM        |
| FEN1                            |                                    | FEN1          |              |                                          |               |              |                               |               |              |                                        |               |              |                                          | FEN1          |              |                                      |               | FANCM        |
| FTF2H1                          |                                    |               |              | FTF2H1                                   |               |              |                               |               |              |                                        |               |              |                                          |               |              |                                      |               |              |
| FTF2H2                          |                                    |               |              | FTF2H2                                   |               | FTF2H2       |                               |               |              |                                        |               |              |                                          |               |              |                                      |               |              |
| FTF2H3                          |                                    |               |              |                                          | FTF2H3        |              |                               |               |              |                                        |               |              |                                          |               |              |                                      |               |              |
| FTF2H4                          |                                    |               |              | FTF2H4                                   |               | FTF2H4       |                               |               |              |                                        |               |              |                                          |               |              |                                      |               |              |
| FTF2H5                          |                                    |               |              | FTF2H5                                   |               |              |                               |               |              |                                        |               |              |                                          |               |              |                                      |               |              |
| HES1                            |                                    |               |              |                                          |               |              |                               |               |              |                                        |               |              |                                          |               |              |                                      |               | HES1         |
| HMGB1                           | HMGB1                              | HMGB1         | HMGB1        |                                          |               |              |                               |               |              |                                        |               |              |                                          |               |              |                                      |               |              |
| LIG1                            | LIG1                               | LIG1          | LIG1         | LIG1                                     | LIG1          | LIG1         | LIG1                          | LIG1          | LIG1         |                                        |               |              | LIG4                                     | LIG4          | LIG4         |                                      |               |              |
| LIG4                            |                                    |               |              |                                          |               |              |                               |               |              |                                        |               |              |                                          |               |              |                                      |               |              |
| MLH1                            |                                    |               |              |                                          |               |              |                               |               |              |                                        |               |              |                                          |               |              |                                      |               | MLH1         |
| MLH3                            |                                    |               |              |                                          |               |              |                               |               |              |                                        |               |              |                                          |               |              |                                      |               |              |
| MNAT1                           |                                    |               |              | MNAT1                                    |               | MNAT1        |                               |               |              |                                        |               |              |                                          |               |              |                                      |               |              |
| MPG                             | MPG                                |               |              |                                          |               |              |                               |               |              |                                        |               |              |                                          |               |              |                                      |               |              |
| MRE11A                          |                                    |               |              |                                          |               |              |                               |               |              | MRE11A                                 | MRE11A        |              | MRE11A                                   | MRE11A        |              |                                      |               |              |
| MSH2                            |                                    |               |              |                                          |               |              |                               | MSH2          | MSH2         |                                        |               |              |                                          |               |              |                                      |               |              |
| MUS81                           |                                    |               |              |                                          |               |              |                               |               |              | MUS81                                  | MUS81         |              |                                          |               |              |                                      |               | MUS81        |
| NEIL1                           | NEIL1                              | NEIL1         | NEIL1        |                                          |               |              |                               |               |              |                                        |               |              |                                          |               |              |                                      |               | MUS81        |
| OGG1                            | OGG1                               |               |              |                                          |               |              |                               |               |              |                                        |               |              |                                          |               |              |                                      |               |              |
| PARP1                           |                                    |               |              |                                          |               |              |                               |               |              |                                        |               |              |                                          |               |              |                                      |               |              |
| PARP2                           | PARP2                              | PARP2         | PARP2        |                                          |               |              |                               |               |              |                                        |               |              |                                          |               |              |                                      |               |              |
| PARP3                           | PARP3                              | PARP3         | PARP3        |                                          |               |              |                               |               |              |                                        |               |              |                                          |               |              |                                      |               |              |
| PARP4                           | PARP4                              |               |              |                                          |               |              |                               |               |              |                                        |               |              |                                          |               |              |                                      |               |              |
| PCNA                            | PCNA                               |               |              | PCNA                                     | PCNA          |              | PCNA                          | PCNA          |              |                                        |               |              |                                          |               |              |                                      |               |              |
| POLB                            |                                    |               |              |                                          |               |              |                               |               |              |                                        |               |              |                                          |               |              |                                      |               |              |
| POLD1                           | POLD1                              | POLD1         | POLD1        | POLD1                                    | POLD1         | POLD1        | POLD1                         | POLD1         | POLD1        | POLD1                                  | POLD1         | POLD1        | POLD1                                    | POLD1         | POLD1        |                                      |               |              |
| POLD2                           | POLD2                              | POLD2         | POLD2        | POLD2                                    | POLD2         | POLD2        | POLD2                         | POLD2         | POLD2        | POLD2                                  | POLD2         | POLD2        | POLD2                                    | POLD2         | POLD2        |                                      |               |              |
| POLD3                           |                                    |               |              |                                          |               |              |                               |               |              |                                        |               |              |                                          |               |              |                                      |               |              |
| POLD4                           | POLD4                              | POLD4         |              | POLD4                                    | POLD4         |              | POLD4                         | POLD4         |              | POLD4                                  | POLD4         |              |                                          |               |              |                                      |               |              |
| POLE                            |                                    |               |              |                                          |               |              |                               |               |              |                                        |               |              |                                          |               |              |                                      |               |              |
| POLE2                           |                                    |               |              |                                          |               |              |                               |               |              |                                        |               |              |                                          |               |              |                                      |               |              |
| POLE4                           | POLE4                              |               |              | POLE4                                    |               |              |                               |               |              |                                        |               |              |                                          |               |              |                                      |               |              |
| POLH                            |                                    |               |              |                                          |               |              |                               |               |              |                                        |               |              |                                          |               |              |                                      |               |              |
| POLK                            |                                    |               |              |                                          |               |              |                               |               |              |                                        |               |              |                                          |               |              |                                      |               | POLK         |
| POLL                            | POLL                               | POLL          | POLL         |                                          |               |              |                               |               |              |                                        |               |              | POLL                                     | POLL          | POLL         |                                      |               | POLL         |
| PRKDC                           |                                    |               |              |                                          |               |              |                               |               |              |                                        |               |              |                                          |               |              |                                      |               |              |
| RAD23A                          |                                    |               |              |                                          |               |              |                               |               |              |                                        |               |              |                                          |               |              |                                      |               |              |
| RAD23B                          |                                    |               |              | RAD23B                                   |               | RAD23B       |                               |               |              |                                        |               |              |                                          |               |              |                                      |               |              |
| RAD50                           |                                    |               |              |                                          |               |              |                               |               |              |                                        |               |              |                                          |               |              |                                      |               |              |
| RAD51                           |                                    |               |              |                                          |               |              |                               |               |              | RAD51                                  | RAD51         | RAD51        |                                          |               |              |                                      |               | RAD51        |
| RAD54B                          |                                    |               |              |                                          |               |              |                               |               |              | RAD54B                                 | RAD54B        | RAD54B       |                                          |               |              |                                      |               |              |
| RAD54L                          |                                    |               |              |                                          |               |              |                               |               |              | RAD54L                                 | RAD54L        | RAD54L       |                                          |               |              |                                      |               |              |
| REV1                            |                                    |               |              |                                          |               |              |                               |               |              |                                        |               |              |                                          |               |              |                                      |               | REV1         |
| REV3L                           |                                    |               |              |                                          |               |              |                               |               |              |                                        |               |              |                                          |               |              |                                      |               | REV3L        |
| RFC1                            |                                    |               |              | RFC1                                     | RFC1          | RFC1         | RFC1                          | RFC1          | RFC1         |                                        |               |              |                                          |               |              |                                      |               |              |
| RFC4                            |                                    |               |              |                                          |               |              |                               |               |              |                                        |               |              |                                          |               |              |                                      |               |              |
| RFC5                            |                                    |               |              | RFC5                                     |               | RFC5         | RFC5                          | RFC5          | RFC5         |                                        |               |              |                                          |               |              |                                      |               |              |
| RM11                            |                                    |               |              |                                          |               |              |                               |               |              |                                        |               |              |                                          |               |              |                                      |               | RM11         |
| RPA1                            | RPA1                               |               |              | RPA1                                     |               |              | RPA1                          | RPA1          | RPA1         | RPA1                                   |               |              |                                          |               |              |                                      |               | RM11         |
| RPA2                            | RPA2                               |               |              | RPA2                                     |               | RPA2         | RPA2                          | RPA2          | RPA2         | RPA2                                   |               |              |                                          |               |              |                                      |               | RPA2         |
| RPA3                            |                                    |               |              |                                          |               |              |                               |               |              |                                        |               |              |                                          |               |              |                                      |               | RPA3         |
| SHFM1                           |                                    |               |              |                                          |               |              |                               |               |              |                                        |               |              |                                          |               |              |                                      |               |              |
| SLX4                            |                                    |               |              |                                          |               |              |                               |               |              |                                        |               |              |                                          |               |              |                                      |               | SLX4         |
| SSBP1                           |                                    |               |              |                                          |               |              |                               |               |              |                                        |               |              |                                          |               |              |                                      |               |              |
| TOP3A                           |                                    |               |              |                                          |               |              |                               |               |              |                                        |               |              |                                          |               |              |                                      |               |              |
| TOP3B                           |                                    |               |              |                                          |               |              |                               |               |              |                                        |               |              |                                          |               |              |                                      |               |              |
| TOPBP1                          |                                    |               |              |                                          |               |              |                               |               |              |                                        |               |              |                                          |               |              |                                      |               |              |
| UNG                             |                                    |               |              |                                          |               |              |                               |               |              |                                        |               |              |                                          |               |              |                                      |               |              |
| XPA                             |                                    |               |              | XPA                                      | XPA           | XPA          |                               |               |              |                                        |               |              |                                          |               |              |                                      |               |              |
| XPC                             |                                    |               |              | XPC                                      |               | XPC          |                               |               |              |                                        |               |              |                                          |               |              |                                      |               |              |
| XRCC1                           | XRCC1                              | XRCC1         | XRCC1        |                                          |               |              |                               |               |              |                                        |               |              |                                          |               |              |                                      |               |              |
| XRCC5                           |                                    |               |              |                                          |               |              |                               |               |              |                                        |               |              | XRCC5                                    | XRCC5         | XRCC5        |                                      |               |              |
| XRCC6                           |                                    |               |              |                                          |               |              |                               |               |              |                                        |               |              | XRCC6                                    | XRCC6         | XRCC6        |                                      |               |              |

Differentially expressed genes
