# Supplementary material for: Comparative transcriptomics reveal a novel tardigrade-specific DNA-binding protein induced in response to ionizing radiation
Source: eLife journal article supplement (doi:10.7554/elife.92621), 2024-01-11

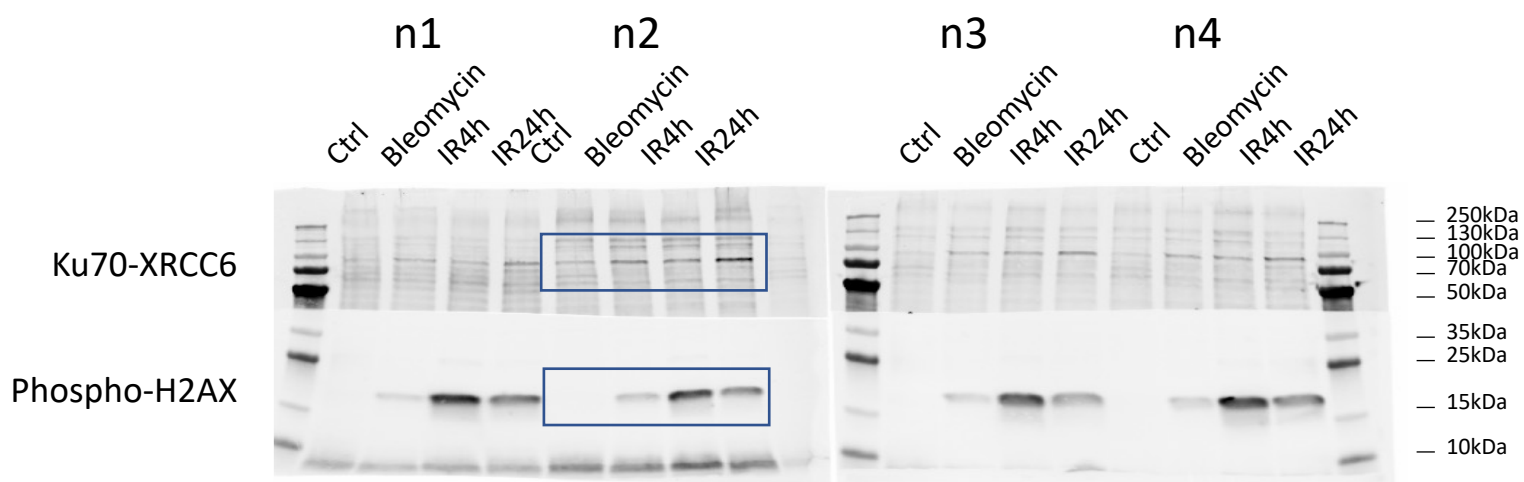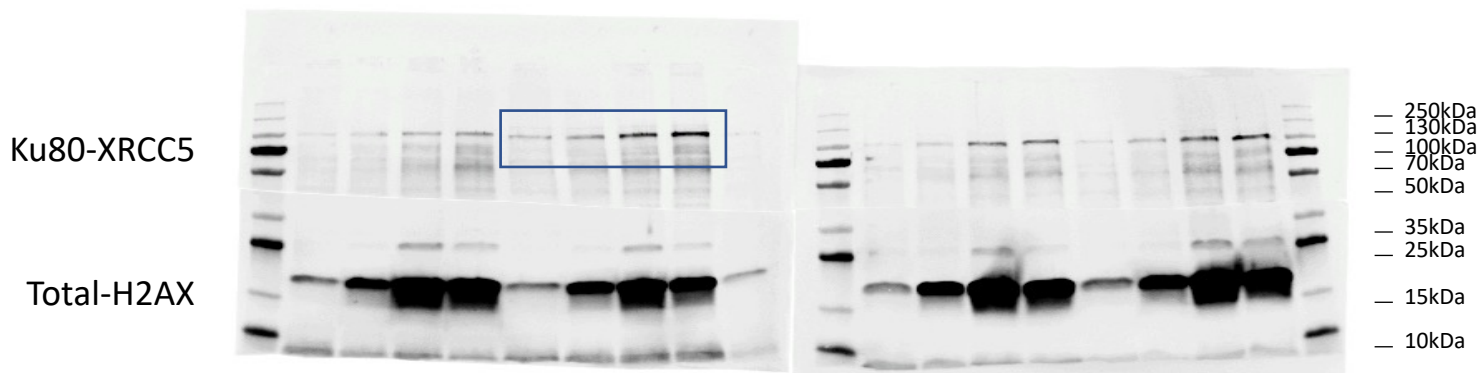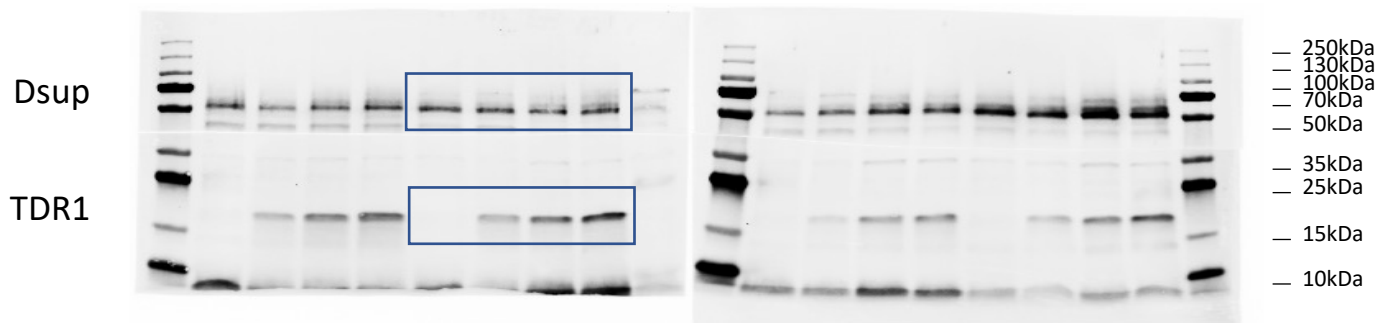

StarBright B520

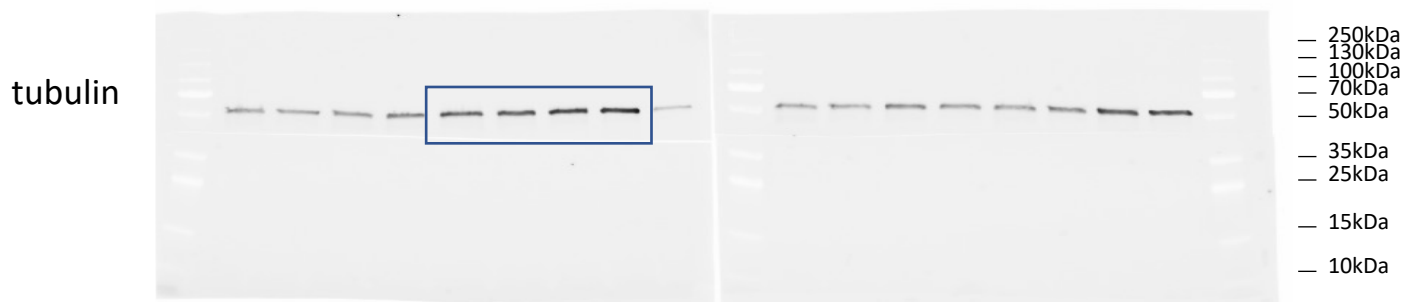

Supplement: fig3-data2 [file elife-92621-fig3-data2-v1.pdf]
