# Supplementary material for: Comparative transcriptomics reveal a novel tardigrade-specific DNA-binding protein induced in response to ionizing radiation
Source: eLife journal article supplement (doi:10.7554/elife.92621), 2024-01-11
Supplement: supp6 [file elife-92621-supp6-v1.pdf]

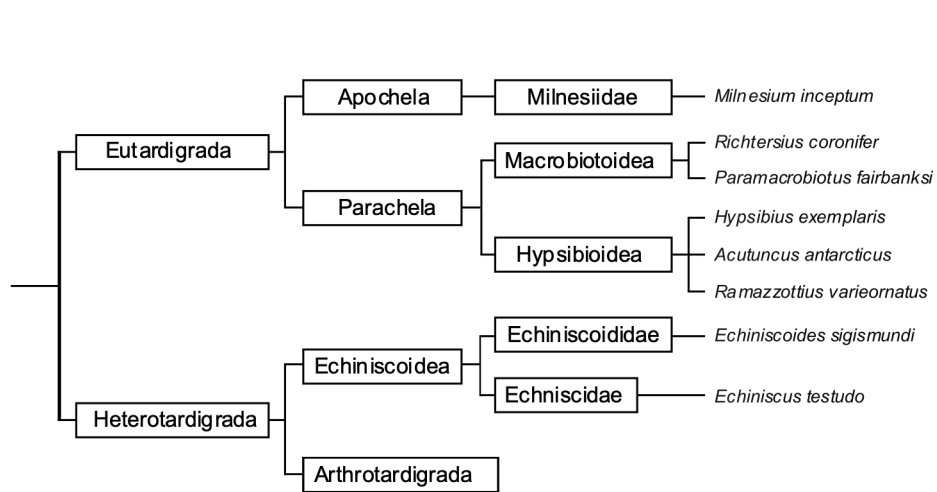

| Nucleus |      | Other cellular compartments |      |      |         |         | Secreted |
|---------|------|-----------------------------|------|------|---------|---------|----------|
| TDR1    | Dsup | AMNP                        | MAHS | CAHS | EtAHS-A | EtAHS-B | SAHS     |
|         |      | ■                           | ■    | ■    |         |         | ■        |
| ■       |      | ■                           | ■    | ■    |         |         | ■        |
| ■       |      | ■                           | ■    | ■    |         |         | ■        |
| ■       | ■    | ■                           | ■    | ■    |         |         | ■        |
|         | ■    | ■                           | ■    | ■    |         |         | ■        |
|         |      | ■                           |      |      |         |         |          |
|         |      | ■                           |      |      | ■       | ■       |          |
